# Supplementary material for: Arene radiofluorination enabled by photoredox-mediated halide interconversion
Source: Springer Nature journal article supplement (doi:10.1038/s41557-021-00835-7), 2021-12-13
Supplement: 41557_2021_835_MOESM1_ESM.mol [file 41557_2021_835_MOESM1_ESM.mol]

nchem.20112595C-comp[18F]FDOPA.mol
  ChemDraw09242114052D

 15 15  0  0  1  0  0  0  0  0999 V2000
   -1.7862    0.0000    0.0000 C   0  0  0  0  0  0  0  0  0  0  0  0
   -1.7862   -0.8250    0.0000 C   0  0  0  0  0  0  0  0  0  0  0  0
   -1.0717   -1.2375    0.0000 C   0  0  0  0  0  0  0  0  0  0  0  0
   -0.3572   -0.8250    0.0000 C   0  0  0  0  0  0  0  0  0  0  0  0
   -0.3572    0.0000    0.0000 C   0  0  0  0  0  0  0  0  0  0  0  0
   -1.0717    0.4125    0.0000 C   0  0  0  0  0  0  0  0  0  0  0  0
    0.3572    0.4125    0.0000 C   0  0  0  0  0  0  0  0  0  0  0  0
    1.0717    0.0000    0.0000 C   0  0  0  0  0  0  0  0  0  0  0  0
    1.7862    0.4125    0.0000 C   0  0  0  0  0  0  0  0  0  0  0  0
    1.0717   -0.8250    0.0000 N   0  0  0  0  0  0  0  0  0  0  0  0
    2.5006    0.0000    0.0000 O   0  0  0  0  0  0  0  0  0  0  0  0
    1.7862    1.2375    0.0000 O   0  0  0  0  0  0  0  0  0  0  0  0
   -2.5006    0.4125    0.0000 O   0  0  0  0  0  0  0  0  0  0  0  0
   -2.5006   -1.2375    0.0000 O   0  0  0  0  0  0  0  0  0  0  0  0
    0.3572   -1.2375    0.0000 F  -1  0  0  0  0  0  0  0  0  0  0  0
  1  2  2  0      
  2  3  1  0      
  3  4  2  0      
  4  5  1  0      
  5  6  2  0      
  6  1  1  0      
  5  7  1  0      
  7  8  1  0      
  8  9  1  0      
  9 11  1  0      
  9 12  2  0      
  1 13  1  0      
  2 14  1  0      
  4 15  1  0      
  8 10  1  1      
M  ISO  1  15  18
M  END
